# Supplementary material
Source: PubMed Central journal article supplement (PMC4843215)
Supplement: rsbl20150817supp1.pdf [file rsbl20150817supp1.pdf]

1 CENP-B box, a nucleotide motif involved in centromere formation, occurs in a  
2 New World monkey

3

4

## 5 **Electronic supplementary material**

6

### 7 **Supplementary methods**

8 (Detailed description of the methods used in this study)

9

10 Immunofluorescent cell staining: Marmoset epithelial cells and human HeLa  
11 cells were cultured in AminoMAX-II Complete Medium (Life technologies) and  
12 D-MEM High Glucose (Wako) supplemented with 10% FBS and  
13 penicillin-streptomycin, respectively, in a humidified incubator set at 37 °C and  
14 5% CO<sub>2</sub>. Immunofluorescence staining was performed as described previously  
15 [14] with a few modifications. Cells grown in glass-bottom plates were fixed in  
16 2.6% formaldehyde in PBS for 10 min at room temperature, and quenched with  
17 0.4% Triton X-100 and 100 mM glycine in PBS for 7 min at room temperature.  
18 The fixed cells were incubated in blocking solution, 1% BSA in PBS-T (PBS  
19 containing 0.1% Triton X-100), for 30 min at room temperature. Primary  
20 antibody incubation was performed in 0.1% BSA in PBS-T for 1 h at room  
21 temperature and the cells were washed with PBS-T four times. Incubation with  
22 fluorescently labeled secondary antibody was performed in 0.1% BSA in PBS-T  
23 for 1 hour at room temperature and the cells were twice washed with PBS-T.  
24 The cells were then incubated in PBS-T containing DAPI for 5 min at room  
25 temperature. After washing with PBS-T and PBS, images were acquired using an  
26 LSM700 microscope (Zeiss) equipped with Alpha Plan-Apochromat 63×/1.46  
27 Oil M27 lens (Zeiss). Three slices of Z-stacks with a spacing of 0.34 μm were  
28 displayed as maximum intensity projections using Zen 2009 (Zeiss). Signals of  
29 small sizes compared to the survey spacing might escape fluorescence detection,  
30 possibly resulting in an underestimation of the signal number. The following  
31 antibodies were used. For CENP-A staining, rat anti-human CENP-A antibody  
32 (6F2 [14]) and goat anti-rat IgG (H+L) secondary antibody, Alexa Fluor 694  
33 conjugate (Life technologies). For CENP-B staining, mouse monoclonal  
34 anti-human CENP-B antibody (5E6C1) and goat anti-mouse IgG (H+L)

35 secondary antibody, Alexa Fluor 488 conjugate (Life technologies). Our  
36 anti-human CENP-A antibody and anti-human CENP-B antibody can be thought  
37 to recognize marmoset CENP-A and CENP-B, respectively, because the amino  
38 acid sequences of marmoset CENP-A and CENP-B exhibit high similarities to  
39 their human equivalents: 91.4% and 96.6% identity, respectively [2].

40

41 Sequencing of fosmid clones for long contig sequences: The strategy of this  
42 method was fully described in our previous reports [13, 18], and its essence is  
43 described here. The fosmid clone to be sequenced (FosMar08) contained a 40-kb  
44 AS fragment. At the boundary between the vector portion and the insert  
45 fragment, there was a recognition site for the restriction endonuclease *Bam*HI.  
46 The insert fragment did not contain a *Bam*HI site. We delivered a Tn5  
47 transposon into this fosmid clone by inducing its transposition, and collected  
48 several secondary clones. The Tn5 transposon had been modified in advance to  
49 carry a *Bam*HI site. This modification enabled us to determine the position of  
50 the Tn5 insertion points by digesting the secondary clones with *Bam*HI and  
51 measuring the fragment size by gel electrophoresis. From the collection of the  
52 secondary clones for which the insertion points were determined, we selected a  
53 total of 24 clones so that neighboring clones would be located within 1.0 kb. We  
54 then sequenced the selected secondary clones by using a pair of primers that  
55 corresponded to the internal region of the Tn5 transposon and were oriented  
56 outwards, which resulted in sequence reads of more than 1.5 kb in length. By  
57 assembling these sequence reads in the order of their positions, we obtained a  
58 contig sequence of 13.1 kb in length.

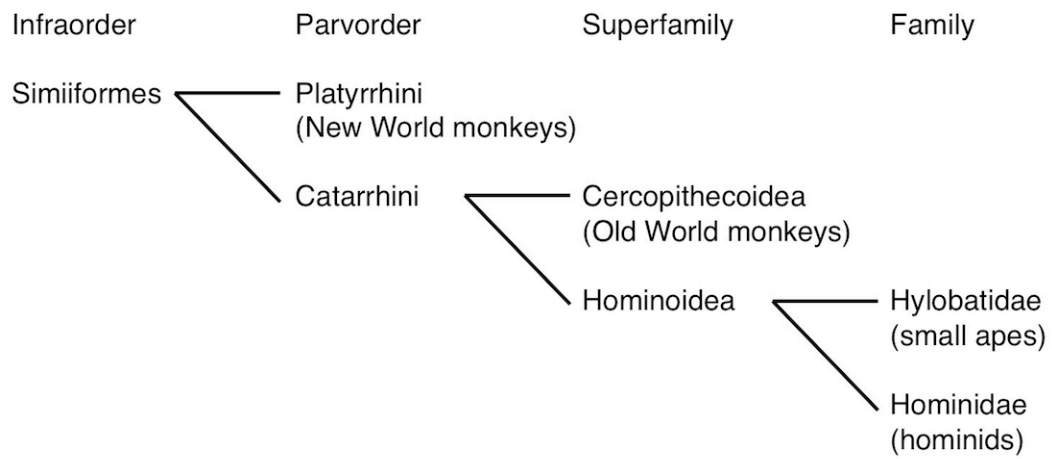

59

60

61 **Figure S1.** Phylogenetic structure of simian primates. The upper branch of each

62 taxonomic level is further divided into lower-level taxa (not shown).

63

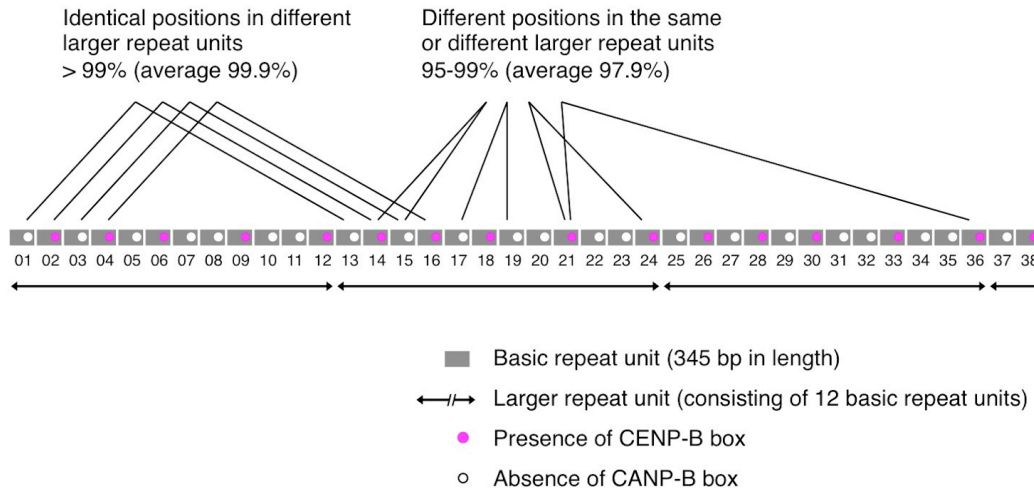

64

65

66 **Figure S2.** Structure of AS repeat units contained in the FosMar08 clone. The  
67 higher-order structure was found in our previous study [12], and sequence  
68 identities observed in this clone are shown. It is clear that repetition of a specific  
69 distribution pattern of CENP-B boxes coincides with the higher-order repeat  
70 structure of AS.

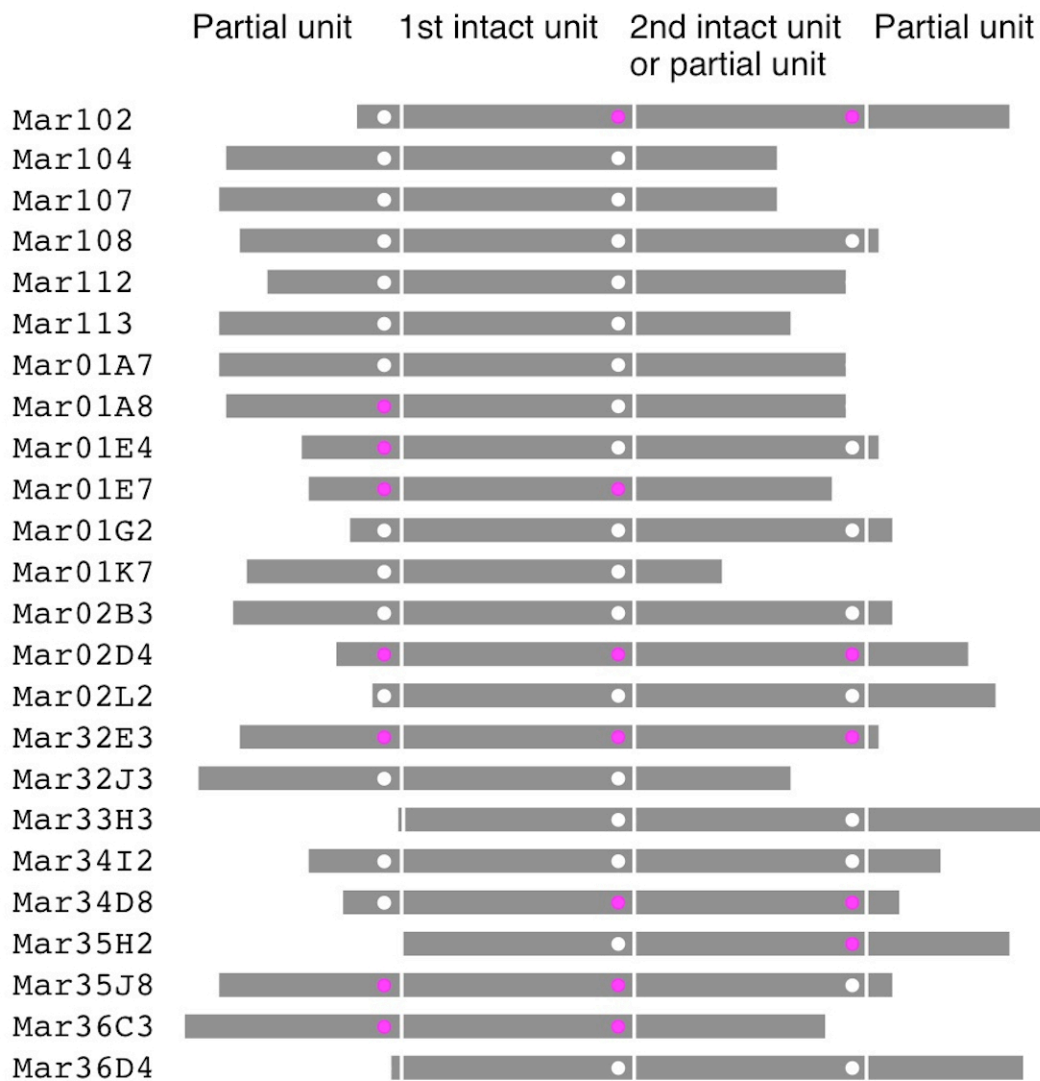

71  
72

73 **Figure S3.** Distribution of CENP-B boxes among repeat units contained in  
 74 sequence reads. The names of the 24 fosmid clones are listed on the left of the  
 75 alignment. Partial or intact repeat units contained in their sequence reads are  
 76 schematically shown. The circles located near the right ends of the repeat units  
 77 indicate sites for CENP-B box. Magenta-coloured and white circles indicate the  
 78 presence and absence of CENP-B boxes, respectively.
